# Supplementary material for: Enhancement of γ/γ’ Microstructured Cobalt Superalloys Produced from Atomized Powder by Creating a Harmonic Structure
Source: MDPI journal article supplement (doi:10.3390/met14010070), 2024-01-07
Supplement: s1 [file s1]

Archive with 1 entries (1 files):
- metals-2779022-supplementary.pdf
