# Supplementary material for: Enhancement of γ/γ’ Microstructured Cobalt Superalloys Produced from Atomized Powder by Creating a Harmonic Structure
Source: MDPI journal article supplement (doi:10.3390/met14010070), 2024-01-07
Supplement: s1 [file s1 › metals-2779022-supplementary.pdf]

### Supplementary materials

In Figure S1, both in Co-9-9-At and Co-9-9-At-Harmonic, can be clearly seen that W is concentrated on  $\gamma'$ . On the other hand,  $\gamma$  is enriched of Co but Al is homogeneously distributed throughout  $\gamma/\gamma'$  structure.

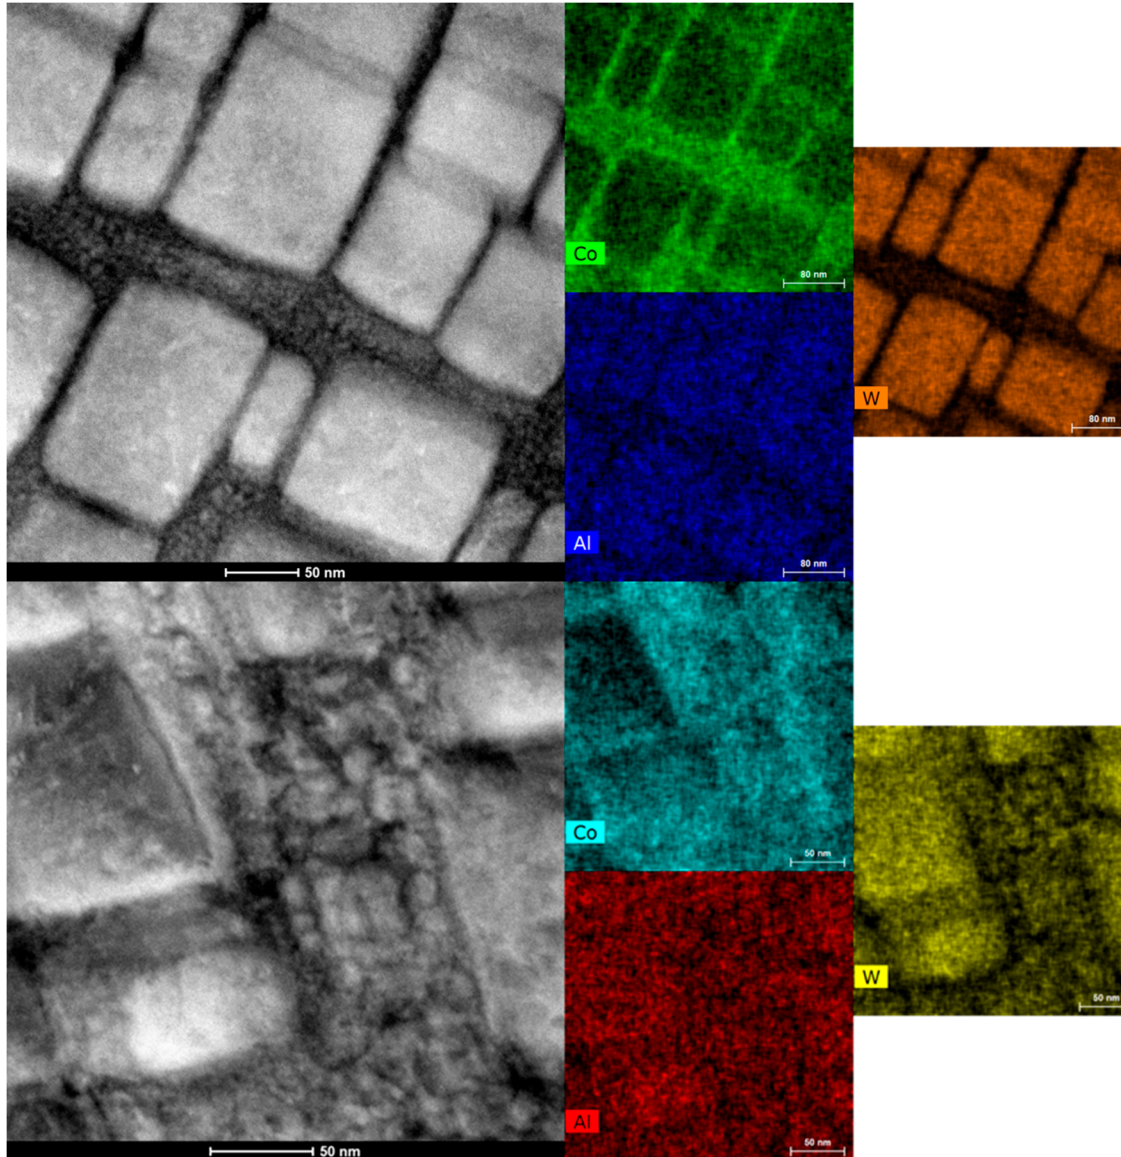

**Figure S1.** EDX-TEM analysis example of Co9-9-At sample after aged heat treatment. Down: harmonic treated materials.
